# Supplementary material for: Interfacial modification of Co(OH)2/Co3O4 nanosheet heterostructure arrays for the efficient oxygen evolution reaction
Source: Royal Society of Chemistry journal article supplement (doi:10.1039/d1cy00240f), 2021-01-01
Supplement: d1cy00240f1.pdf [file d1cy00240f1.pdf]

## Supporting information

### Interfacial Modification of Co(OH)<sub>2</sub>/Co<sub>3</sub>O<sub>4</sub> Nanosheet Heterostructure Arrays for Efficient Oxygen Evolution Reaction

Lekai Zheng,<sup>ab</sup> Lina Hu,<sup>ab</sup> Yongchuan Hu,<sup>ab</sup> Fang Liu,<sup>ab</sup> Zhiming Liu,<sup>ab</sup> Yanming

Xue,<sup>ab</sup> Jun Zhang,<sup>\*ab</sup> Hui Liu,<sup>\*a</sup> and Chengchun Tang,<sup>a,b</sup>

<sup>a</sup> School of Material Science and Engineering, Hebei University of Technology,  
Dingzigu Road 1, Tianjin 300130, P. R. China

<sup>b</sup> Hebei Key Laboratory of Boron Nitride Micro and Nano Materials, Guangrongdao  
Road 29, Tianjin 300130, P. R. China

**E-mail address:** [junnano@gmail.com](mailto:junnano@gmail.com) (J. Zhang), [liuhuihebut@163.com](mailto:liuhuihebut@163.com) (H. Liu)

**Calibration of Hg/HgO electrode and conversion to RHE:** The reference electrodes were calibrated prior to measurement in hydrogen saturated solution using two platinum wires as working and counter electrodes in a standard three-electrode system. Cyclic voltammograms (CV) were performed at a scan rate of 1 mV/s, and the average of the two potentials where the current crossed zero was taken to be the thermodynamic potential of the HER. In 1 M KOH, the zero current point is at -0.927 V, so  $E_{(RHE)} = E_{(Hg/HgO)} + 0.927$  V.

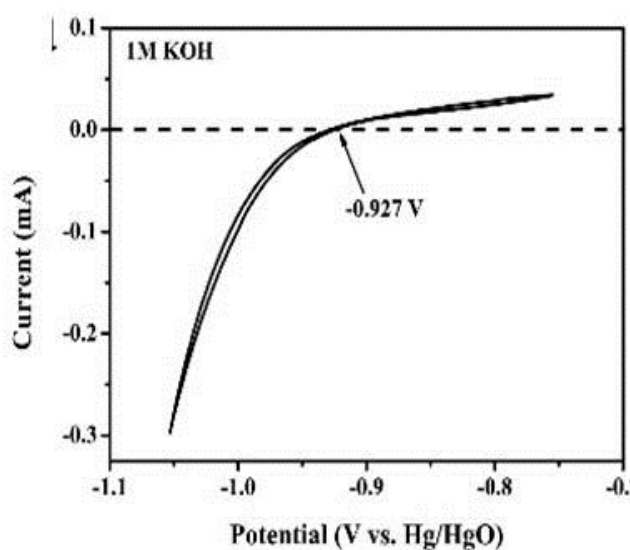

**Supporting information consists of 8 pages, including this page.**

There are 7 Figures and 1 Table.

### List of Figures

**Figure S1.** (a, b) SEM images of pure carbon cloth at different magnifications.

**Figure S2.** (a) The SEM image and (b, c) EDS spectra of  $\alpha$ -Co(OH)<sub>2</sub>/Co<sub>3</sub>O<sub>4</sub>/CC-600s.

**Figure S3.** (a) LSV and (b) Tafel curves of IrO<sub>2</sub> and  $\alpha$ -Co(OH)<sub>2</sub>/Co<sub>3</sub>O<sub>4</sub>/CC.

**Figure S4.** LSV curves corresponding to different deposition time of  $\alpha$ -Co(OH)<sub>2</sub>/Co<sub>3</sub>O<sub>4</sub>/CC in the first step (10, 15, 20, 25mins).

**Figure S5.** (a)  $\alpha$ -Co(OH)<sub>2</sub>/CC, (b) Co<sub>3</sub>O<sub>4</sub>/CC, (c)  $\alpha$ -Co(OH)<sub>2</sub>/Co<sub>3</sub>O<sub>4</sub>/CC-300, (d)  $\alpha$ -Co(OH)<sub>2</sub>/Co<sub>3</sub>O<sub>4</sub>/CC-600 and (e)  $\alpha$ -Co(OH)<sub>2</sub>/Co<sub>3</sub>O<sub>4</sub>/CC-900 of CV curves.

**Figure S6.** Adsorption and desorption curves of Co(OH)<sub>2</sub>/Co<sub>3</sub>O<sub>4</sub>/CC-600s and

Co(OH)<sub>2</sub>/CC.

**Figure S7.** (a) XRD pattern, (b) SEM images, (c) Co 2p and (d) O 1s spectra of  $\alpha$ -Co(OH)<sub>2</sub>/Co<sub>3</sub>O<sub>4</sub>/CC-600s after long-term durability test.

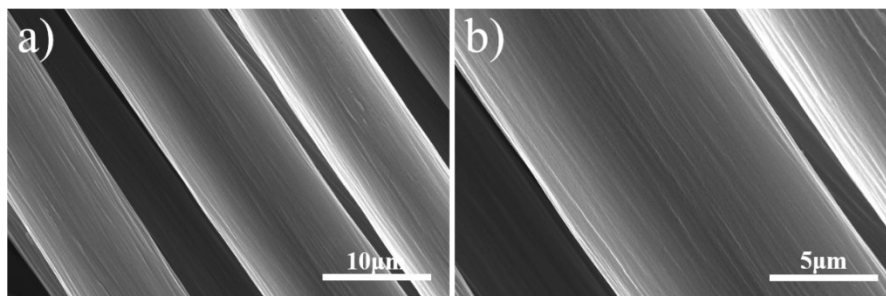

**Figure S1.** (a, b) SEM images of pure carbon cloth at different magnifications.

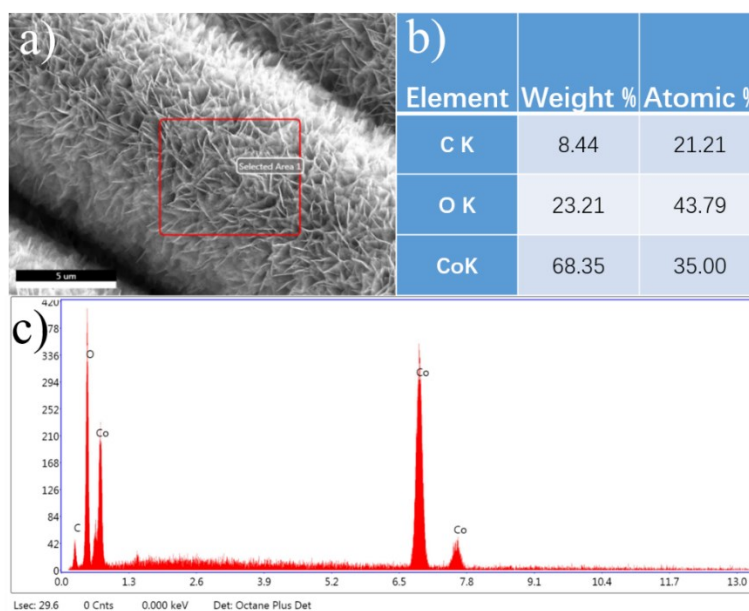

**Figure S2.** (a) The SEM image and (b, c) EDS spectra of  $\alpha$ -Co(OH)<sub>2</sub>/Co<sub>3</sub>O<sub>4</sub>/CC-600s.

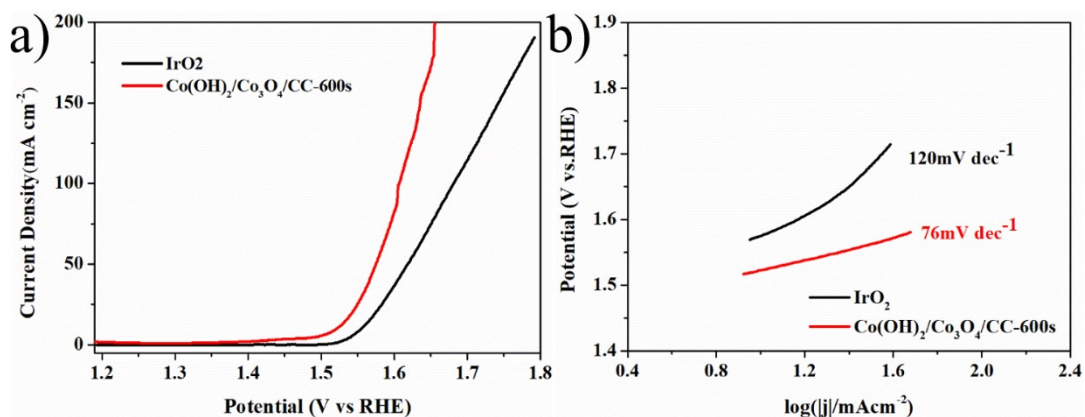

**Figure S3.** (a) LSV and (b) Tafel curves of IrO<sub>2</sub> and  $\alpha$ -Co(OH)<sub>2</sub>/Co<sub>3</sub>O<sub>4</sub>/CC.

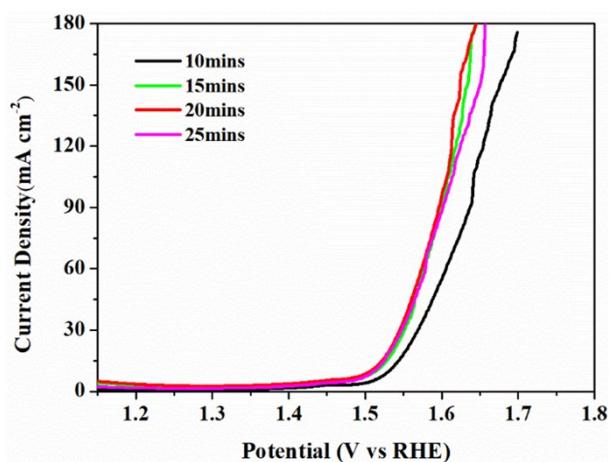

**Figure S4.** LSV curves corresponding to different deposition time of  $\alpha$ - $\text{Co}(\text{OH})_2/\text{Co}_3\text{O}_4/\text{CC}$  in the first step (10, 15, 20, 25mins).

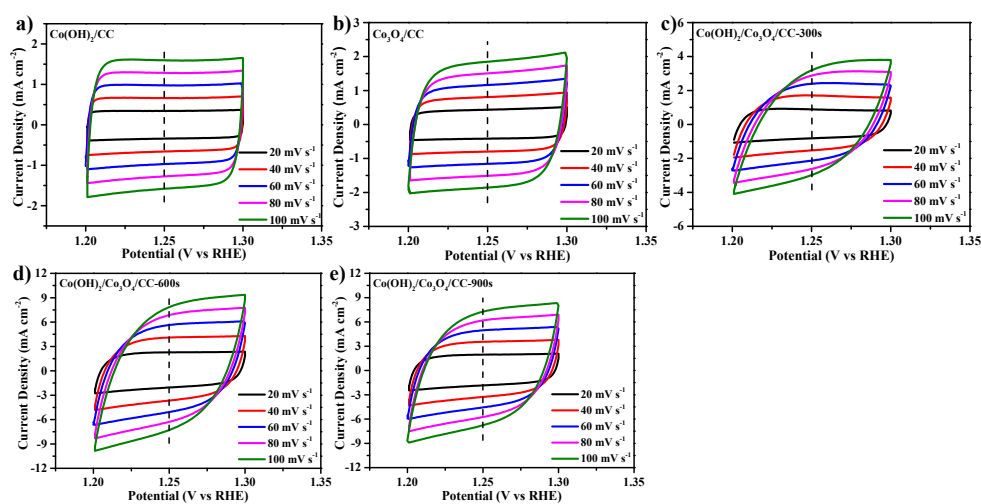

**Figure S5.** (a)  $\alpha$ - $\text{Co}(\text{OH})_2/\text{CC}$ , (b)  $\text{Co}_3\text{O}_4/\text{CC}$ , (c)  $\alpha$ - $\text{Co}(\text{OH})_2/\text{Co}_3\text{O}_4/\text{CC}$ -300, (d)  $\alpha$ - $\text{Co}(\text{OH})_2/\text{Co}_3\text{O}_4/\text{CC}$ -600 and (e)  $\alpha$ - $\text{Co}(\text{OH})_2/\text{Co}_3\text{O}_4/\text{CC}$ -900 of CV curves.

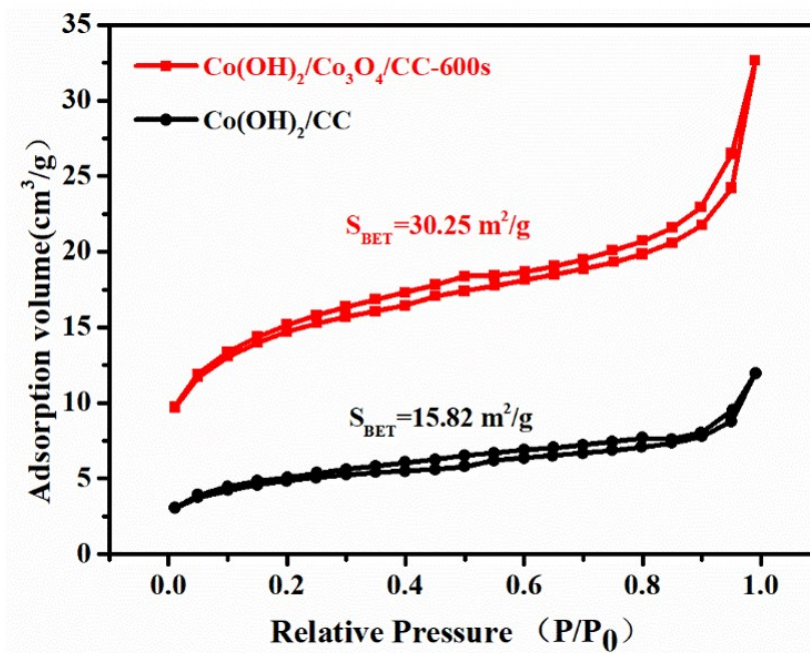

**Figure S6.** Adsorption and desorption curves of  $\text{Co(OH)}_2/\text{Co}_3\text{O}_4/\text{CC-600s}$  and  $\text{Co(OH)}_2/\text{CC}$ .

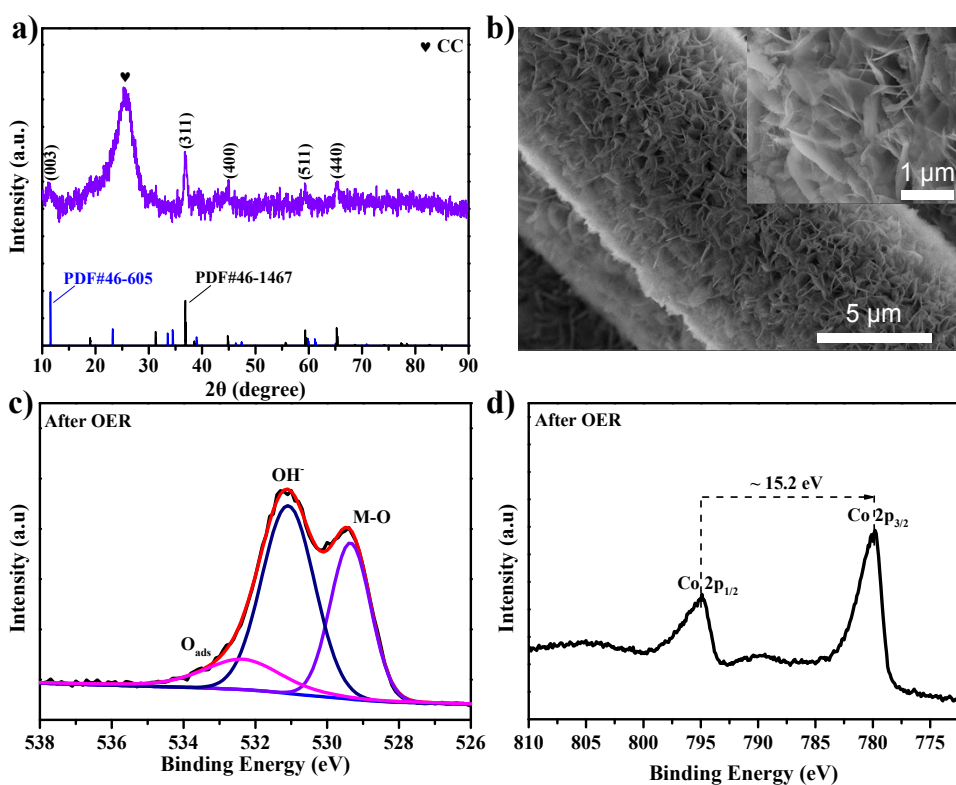

**Figure S7.** (a) XRD pattern, (b) SEM images, (c) Co 2p and (d) O 1s spectra of  $\alpha\text{-Co(OH)}_2/\text{Co}_3\text{O}_4/\text{CC-600s}$  after long-term durability test.

**Table S1.** The OER performances of  $\alpha$ -Co(OH)<sub>2</sub>/Co<sub>3</sub>O<sub>4</sub>/CC with previously reported non-precious metal electrocatalysts.

| Catalyst                                                                                          | Substrate | Electrolyte | $\eta_{10}$ (mv vs RHE) | Tafel slope (mV dec-1) | Ref. |
|---------------------------------------------------------------------------------------------------|-----------|-------------|-------------------------|------------------------|------|
| This work                                                                                         | CC        | 1M KOH      | 275                     | 76                     |      |
| Fe-CoP/CoO                                                                                        | GCE       | 1M KOH      | 219                     | 52                     | 1    |
| Co <sub>1.8</sub> Ni(OH) <sub>5.6</sub> @Co <sub>1.8</sub> NiS <sub>0.4</sub> (OH) <sub>4.8</sub> | GCE       | 0.1M KOH    | 274                     | 45                     | 2    |
| Fe/Co200                                                                                          | GCE       | 1M KOH      | 302                     | 45                     | 3    |
| Co(OH) <sub>2</sub> NPs/Co <sub>3</sub> O <sub>4</sub> NCs                                        | GCE       | 1M KOH      | 281                     | 52.7                   | 4    |
| Co <sub>3</sub> O <sub>4</sub> /CeO <sub>2</sub> @N-CNFs                                          | GCE       | 0.1 M KOH   | 310                     | 85                     | 5    |
| Co <sub>3</sub> O <sub>4</sub> /Co(OH) <sub>2</sub>                                               | GCE       | 1M KOH      | 373                     | 103.1                  | 6    |
| Fe <sub>3</sub> O <sub>4</sub> /Co(OH) <sub>2</sub> NSs                                           | GCE       | 0.1 M KOH   | 390                     | 61.1                   | 7    |
| CoFe LDH/Co <sub>0.85</sub> Se                                                                    | CC        | 1M KOH      | 241                     | 48                     | 8    |

CC: Carbon cloth

GCE: Glassy carbon electrode

#### Reference

1. X. H. A, S. Z. B, J. S. A, L. Y. A, X. Q. A, R. H. A, Y. W. A, H. Z. A and J. Z. A, *Nano Energy*, **2019**, 56, 109-117.
2. B. Wang, C. Tang, H. F. Wang, X. Chen, R. Cao and Q. Zhang, *Adv. Mater.*, **2019**, 31, 1805658.1805651-1805658.1805657.
3. H. Yiyin, Y. Rui, A. Ganesan, X. Jiafang, L. Jiangquan, Z. Xiaotao, W. Xueyuan, W. Maoxiang, L. Qiaohong and W. Yaobing, *ACS Energy Lett.*, **2018**, acsenergylett.8b01071-.
4. X. Hui, W. Jingjing, Z. Min, L. Chaofan, S. Yukihide, W. Caiqin and D. Yukou, *Nanoscale*, **2018**, 10, 10.1039.C1038NR05883K-.
5. T. Li, S. Li, Q. Liu, Y. Tian and Y. Tang, *ACS Sustain. Chem. Eng.*, **2019**, 2019.
6. X. Q. Du, H. Pan and Y. Zhi, *New J. Chem.*, **2018**, 10.1039.C1037NJ05146H.
7. F. Sun, L. Li, G. Wang and Y. Lin, *J. Mater. Chem. A*, **2017**, 5.
8. W. Jin, F. Liu, X. Guo, J. Zhang, L. Zheng, Y. Hu, J. Mao, H. Liu, Y. Xue and C. Tang, *Catal. Technol.*, **2019**, 9, 5736-5744.
